# Supplementary material
Source: publisher figshare collection journal article supplement (https://aacr.figshare.com/articles/dataset/_/22425181)
Supplement: Supplementary file 1 [file 39871393]

## **Supplementary Table Legends**

**Supplementary Table S1:** Documentation of model components, interactions and regulatory rules.

**Supplementary Table S2:** Phenotype reached upon systematic in silico analysis of single and double mutants.

## Supplementary References

1. Bottaro DP, Rubin JS, Faletto DL, Chan AM, Kmieciak TE, Vande Woude GF, et al. Identification of the hepatocyte growth factor receptor as the c-met proto-oncogene product. *Science*. American Association for the Advancement of Science; 1991;251:802–4.
2. Guo L, Kozlosky CJ, Ericsson LH, Daniel TO, Cerretti DP, Johnson RS. Studies of ligand-induced site-specific phosphorylation of epidermal growth factor receptor. *J. Am. Soc. Mass Spectrom*. Springer-Verlag; 2003. page 1022–31.
3. Sierke SL, Longo GM, Koland JG. Structural Basis of Interactions Between Epidermal Growth Factor Receptor and SH2 Domain Proteins. *Biochem Biophys Res Commun*. 1993;191:45–54.
4. Paszek MJ, Zahir N, Johnson KR, Lakins JN, Rozenberg GI, Gefen A, et al. Tensional homeostasis and the malignant phenotype. *Cancer Cell*. Cell Press; 2005;8:241–54.
5. Massagué J, Andres J, Attisano L, Cheifetz S, López-Casillas F, Ohtsuki M, et al. TGF- $\beta$  receptors. *Mol Reprod Dev*. 1992;32:99–104.
6. Ebner R, Chen RH, Lawler S, Zioncheck T, Derynck R. Determination of type I receptor specificity by the type II receptors for TGF-beta or activin. *Science*. 1993;262:900–2.
7. Jung IH, Choi JH-K, Chung Y-Y, Lim G-L, Park Y-N, Park SW. Predominant Activation of JAK/STAT3 Pathway by Interleukin-6 Is Implicated in Hepatocarcinogenesis. *Neoplasia*. Neoplasia Press; 2015;17:586–97.
8. Heitzler P, Simpson P. The choice of cell fate in the epidermis of *Drosophila*. *Cell*. 1991;64:1083–92.
9. Shimizu K, Chiba S, Saito T, Kumano K, Hirai H. Physical Interaction of Delta1, Jagged1, and Jagged2 with Notch1 and Notch3 Receptors. *Biochem Biophys Res Commun*. 2000;276:385–9.
10. Sap J, Jiang YP, Friedlander D, Grumet M, Schlessinger J. Receptor tyrosine phosphatase R-PTP-kappa mediates homophilic binding. *Mol Cell Biol*. American Society for Microbiology; 1994;14:1–9.
11. Bennett FC, Harvey KF. Fat Cadherin Modulates Organ Size in *Drosophila* via the Salvador/Warts/Hippo Signaling Pathway. *Curr Biol*. Cell Press; 2006;16:2101–10.
12. Qi C, Zhu YT, Hu L, Zhu Y-J. Identification of Fat4 as a candidate tumor suppressor

- gene in breast cancers. *Int J cancer*. NIH Public Access; 2009;124:793–8.
13. Matsuzawa A, Ichijo H. Redox control of cell fate by MAP kinase: physiological roles of ASK1-MAP kinase pathway in stress signaling. *Biochim. Biophys. Acta - Gen. Subj.* Elsevier; 2008. page 1325–36.
  14. D'Ignazio L, Rocha S. Hypoxia Induced NF- $\kappa$ B. *Cells*. Multidisciplinary Digital Publishing Institute (MDPI); 2016;5.
  15. Xu Y, Shao Y, Voorhees JJ, Fisher GJ. Oxidative Inhibition of Receptor-type Protein-tyrosine Phosphatase  $\kappa$  by Ultraviolet Irradiation Activates Epidermal Growth Factor Receptor in Human Keratinocytes. *J Biol Chem*. 2006;281:27389–97.
  16. Park J Il, Kim SW, Lyons JP, Ji H, Nguyen TT, Cho K, et al. Kaiso/p120-Catenin and TCF/ $\beta$ -Catenin complexes coordinately regulate canonical Wnt gene targets. *Dev Cell*. Cell Press; 2005;8:843–54.
  17. Giannoni E, Buricchi F, Raugei G, Ramponi G, Chiarugi P. Intracellular Reactive Oxygen Species Activate Src Tyrosine Kinase during Cell Adhesion and Anchorage-Dependent Cell Growth. *Mol Cell Biol*. 2005;25:6391–403.
  18. del Valle-Perez B, Casagolda D, Lugilde E, Valls G, Codina M, Dave N, et al. Wnt controls the transcriptional activity of Kaiso through CK1 -dependent phosphorylation of p120-catenin. *J Cell Sci*. 2016;129:873–873.
  19. Casagolda D, del Valle-Perez B, Valls G, Lugilde E, Vinyoles M, Casado-Vela J, et al. A p120-catenin-CK1 complex regulates Wnt signaling. *J Cell Sci*. 2010;123:2621–31.
  20. Gardner AM, Vaillancourt RR, Lange-Carter CA, Johnson GL. MEK-1 phosphorylation by MEK kinase, Raf, and mitogen-activated protein kinase: analysis of phosphopeptides and regulation of activity. *Mol Biol Cell*. American Society for Cell Biology; 1994;5:193–201.
  21. Andl CD, Mizushima T, Oyama K, Bowser M, Nakagawa H, Rustgi AK. EGFR-induced cell migration is mediated predominantly by the JAK-STAT pathway in primary esophageal keratinocytes. *Am J Physiol Gastrointest Liver Physiol*. American Physiological Society; 2004;287:G1227-37.
  22. Eberwein P, Laird D, Schulz S, Reinhard T, Steinberg T, Tomakidi P. Modulation of focal adhesion constituents and their down-stream events by EGF: On the cross-talk of integrins and growth factor receptors. *Biochim Biophys Acta - Mol Cell Res*. 2015;1853:2183–98.
  23. Mitra AK, Sawada K, Tiwari P, Mui K, Gwin K, Lengyel E. Ligand-independent activation of c-Met by fibronectin and  $\alpha 5\beta 1$ -integrin regulates ovarian cancer invasion

- and metastasis. *Oncogene*. Nature Publishing Group; 2011;30:1566–76.
24. Hecker TP, Ding Q, Rege TA, Hanks SK, Gladson CL. Overexpression of FAK promotes Ras activity through the formation of a FAK/p120RasGAP complex in malignant astrocytoma cells. *Oncogene*. Nature Publishing Group; 2004;23:3962–71.
  25. Schlaepfer DD, Hanks SK, Hunter T, van der Geer P. Integrin-mediated signal transduction linked to Ras pathway by GRB2 binding to focal adhesion kinase.. *Nature*. 1994. page 786–91.
  26. Hiscox S, Jiang WG. Association of the HGF/SF receptor, c-met, with the cell-surface adhesion molecule, E-cadherin, and catenins in human tumor cells. *Biochem Biophys Res Commun*. Academic Press; 1999;261:406–11.
  27. Xu G, Craig AWB, Greer P, Miller M, Anastasiadis PZ, Lilien J, et al. Continuous association of cadherin with beta-catenin requires the non-receptor tyrosine-kinase Fer. *J Cell Sci*. The Company of Biologists Ltd; 2004;117:3207–19.
  28. Moro L, Dolce L, Cabodi S, Bergatto E, Erba EB, Smeriglio M, et al. Integrin-induced Epidermal Growth Factor (EGF) Receptor Activation Requires c-Src and p130Cas and Leads to Phosphorylation of Specific EGF Receptor Tyrosines. *J Biol Chem*. 2002;277:9405–14.
  29. Cruet-Hennequart S, Maubant S, Luis J, Gauduchon P, Staedel C, Dedhar S.  $\alpha$ v integrins regulate cell proliferation through integrin-linked kinase (ILK) in ovarian cancer cells. *Oncogene*. 2003;22:1688–702.
  30. Hannigan GE, Leung-Hagesteijn C, Fitz-Gibbon L, Coppolino MG, Radeva G, Filmus J, et al. Regulation of cell adhesion and anchorage-dependent growth by a new  $\beta$ 1-integrin-linked protein kinase. *Nature*. 1996;379:91–6.
  31. Schlaepfer DD, Broome MA, Hunter T. Fibronectin-stimulated signaling from a focal adhesion kinase-c-Src complex: involvement of the Grb2, p130cas, and Nck adaptor proteins. *Mol Cell Biol*. American Society for Microbiology; 1997;17:1702–13.
  32. Ruest PJ, Shin NY, Polte TR, Zhang X, Hanks SK. Mechanisms of CAS substrate domain tyrosine phosphorylation by FAK and Src. *Mol Cell Biol*. American Society for Microbiology; 2001;21:7641–52.
  33. Sakai R, Iwamatsu A, Hirano N, Ogawa S, Tanaka T, Mano H, et al. A novel signaling molecule, p130, forms stable complexes in vivo with v-Crk and v-Src in a tyrosine phosphorylation-dependent manner. *EMBO J*. European Molecular Biology Organization; 1994;13.
  34. Gotoh T, Hattori S, Nakamura S, Kitayama H, Noda M, Takai Y, et al. Identification

- of Rap1 as a target for the Crk SH3 domain-binding guanine nucleotide-releasing factor C3G. *Mol Cell Biol*. American Society for Microbiology; 1995;15:6746–53.
35. Ricono JM, Huang M, Barnes LA, Lau SK, Weis SM, Schlaepfer DD, et al. Specific Cross-talk between Epidermal Growth Factor Receptor and Integrin  $\alpha 5$  Promotes Carcinoma Cell Invasion and Metastasis. *Cancer Res*. 2009;69:1383–91.
  36. Fujita Y, Krause G, Scheffner M, Zechner D, Leddy HEM, Behrens J, et al. Hakai, a c-Cbl-like protein, ubiquitinates and induces endocytosis of the E-cadherin complex. *Nat Cell Biol*. Nature Publishing Group; 2002;4:222–31.
  37. Koenig A, Mueller C, Hasel C, Adler G, Menke A. Collagen Type I Induces Disruption of E-Cadherin–Mediated Cell-Cell Contacts and Promotes Proliferation of Pancreatic Carcinoma Cells. *Cancer Res*. 2006;66:4662–71. A
  38. Roura S, Miravet S, Piedra J, García de Herreros A, Duñach M. Regulation of E-cadherin/Catenin association by tyrosine phosphorylation. *J Biol Chem*. American Society for Biochemistry and Molecular Biology; 1999;274:36734–40.
  39. Xia H, Nho RS, Kahm J, Kleidon J, Henke CA. Focal Adhesion Kinase Is Upstream of Phosphatidylinositol 3-Kinase/Akt in Regulating Fibroblast Survival in Response to Contraction of Type I Collagen Matrices via a  $\beta 1$  Integrin Viability Signaling Pathway. *J Biol Chem*. 2004;279:33024–34.
  40. Turkson J, Bowman T, Garcia R, Caldenhoven E, De Groot RP, Jove R. Stat3 activation by Src induces specific gene regulation and is required for cell transformation. *Mol Cell Biol*. 1998;18:2545–52.
  41. Kiyokawa E, Hashimoto Y, Kobayashi S, Sugimura H, Kurata T, Matsuda M. Activation of Rac1 by a Crk SH3-binding protein, DOCK180. *Genes Dev*. Cold Spring Harbor Laboratory Press; 1998;12:3331–6.
  42. Manser E, Leung T, Salihuddin H, Zhao Z, Lim L. A brain serine/threonine protein kinase activated by Cdc42 and Rac1. *Nature*. 1994;367:40–6.
  43. Yoshizumi M, Abe J, Haendeler J, Huang Q, Berk BC. Src and Cas mediate JNK activation but not ERK1/2 and p38 kinases by reactive oxygen species. *J Biol Chem*. American Society for Biochemistry and Molecular Biology; 2000;275:11706–12.
  44. Avruch J, Khokhlatchev A, Kyriakis JM, Luo Z, Tzivion G, Vavvas D, et al. Ras activation of the Raf kinase: tyrosine kinase recruitment of the MAP kinase cascade. *Recent Prog Horm Res*. 2001;56:127–55.
  45. Rodriguez-Viciana P, Warne PH, Khwaja A, Marte BM, Pappin D, Das P, et al. Role of phosphoinositide 3-OH kinase in cell transformation and control of the actin

- cytoskeleton by Ras. *Cell. Elsevier*; 1997;89:457–67.
46. Shin I, Kim S, Song H, Kim H-RC, Moon A. H-Ras-specific activation of Rac-MKK3/6-p38 pathway: its critical role in invasion and migration of breast epithelial cells. *J Biol Chem. American Society for Biochemistry and Molecular Biology*; 2005;280:14675–83.
  47. Seger R, Ahn NG, Posada J, Munar ES, Jensen AM, Cooper JA, et al. Purification and characterization of mitogen-activated protein kinase activator(s) from epidermal growth factor-stimulated A431 cells. *J Biol Chem.* 1992;267:14373–81.
  48. Ding Q, Xia W, Liu J-C, Yang J-Y, Lee D-F, Xia J, et al. Erk Associates with and Primes GSK-3 $\beta$  for Its Inactivation Resulting in Upregulation of  $\beta$ -Catenin. *Mol Cell.* 2005;19:159–70.
  49. Lemieux É, Bergeron S, Durand V, Asselin C, Saucier C, Rivard N. Constitutively active MEK1 is sufficient to induce epithelial-to-mesenchymal transition in intestinal epithelial cells and to promote tumor invasion and metastasis. *Int J Cancer.* 2009;125:1575–86.
  50. Ito T, Taniguchi H, Fukagai K, Okamuro S, Kobayashi A. Inhibitory Mechanism of FAT4 Gene Expression in Response to Actin Dynamics during Src-Induced Carcinogenesis. Rishi A, editor. *PLoS One.* 2015;10:e0118336.
  51. Franke TF, Kaplan DR, Cantley LC, Toker A. Direct regulation of the Akt proto-oncogene product by phosphatidylinositol-3,4-bisphosphate. *Science.* 1997;275:665–8.
  52. Alessi DR, James SR, Downes CP, Holmes AB, Gaffney PRJ, Reese CB, et al. Characterization of a 3-phosphoinositide-dependent protein kinase which phosphorylates and activates protein kinase B $\alpha$ . *Curr Biol.* 1997;7:261–9.
  53. Delcommenne M, Tan C, Gray V, Rue L, Woodgett J, Dedhar S. Phosphoinositide-3-OH kinase-dependent regulation of glycogen synthase kinase 3 and protein kinase B/AKT by the integrin-linked kinase. *Proc Natl Acad Sci U S A.* 1998;95:11211–6.
  54. Fan R, Kim N-G, Gumbiner BM. Regulation of Hippo pathway by mitogenic growth factors via phosphoinositide 3-kinase and phosphoinositide-dependent kinase-1. *Proc Natl Acad Sci.* 2013;110:2569–74.
  55. King CC, Gardiner EM, Zenke FT, Bohl BP, Newton AC, Hemmings BA, et al. p21-activated kinase (PAK1) is phosphorylated and activated by 3-phosphoinositide-dependent kinase-1 (PDK1). *J Biol Chem. American Society for Biochemistry and Molecular Biology*; 2000;275:41201–9.
  56. Serrano I, McDonald PC, Lock FE, Dedhar S. Role of the integrin-linked kinase (ILK)/

- Rictor complex in TGF $\beta$ -1-induced epithelial-mesenchymal transition (EMT). *Oncogene*. 2013;32:50–60.
57. Zhou BP, Deng J, Xia W, Xu J, Li YM, Gunduz M, et al. Dual regulation of Snail by GSK-3 $\beta$ -mediated phosphorylation in control of epithelial–mesenchymal transition. *Nat Cell Biol*. 2004;6:931–40.
  58. Bai D, Ueno L, Vogt PK. Akt-mediated regulation of NFkappaB and the essentialness of NFkappaB for the oncogenicity of PI3K and Akt. *Int J cancer*. NIH Public Access; 2009;125:2863–70.
  59. Stamos JL, Weis WI. The  $\beta$ -Catenin Destruction Complex. *Cold Spring Harb Perspect Biol*. 2013;5:a007898–a007898.
  60. Kao S-H, Wang W-L, Chen C-Y, Chang Y-L, Wu Y-Y, Wang Y-T, et al. GSK3 $\beta$  controls epithelial–mesenchymal transition and tumor metastasis by CHIP-mediated degradation of Slug. *Oncogene*. 2014;33:3172–82.
  61. Ding VW, Chen RH, McCormick F. Differential regulation of glycogen synthase kinase 3beta by insulin and Wnt signaling. *J Biol Chem*. American Society for Biochemistry and Molecular Biology; 2000;275:32475–81.
  62. Collu GM, Hidalgo-Sastre A, Acar A, Bayston L, Gildea C, Leverentz MK, et al. Dishevelled limits Notch signalling through inhibition of CSL. *Development*. 2012;139:4405–15.
  63. del Valle-Perez B, Arques O, Vinyoles M, de Herreros AG, Dunach M. Coordinated Action of CK1 Isoforms in Canonical Wnt Signaling. *Mol Cell Biol*. 2011;31:2877–88.
  64. Hao Y, Chun A, Cheung K, Rashidi B, Yang X. Tumor suppressor LATS1 is a negative regulator of oncogene YAP. *J Biol Chem*. American Society for Biochemistry and Molecular Biology; 2008;283:5496–509.
  65. Kopan R, Ilagan MXG. The Canonical Notch Signaling Pathway: Unfolding the Activation Mechanism. *Cell*. Cell Press; 2009. page 216–33.
  66. Grannas K, Arngården L, Lönn P, Mazurkiewicz M, Blokzijl A, Zieba A, et al. Crosstalk between Hippo and TGF $\beta$ : Subcellular Localization of YAP/TAZ/Smad Complexes. *J Mol Biol*. 2015;427:3407–15.
  67. Varelas X, Sakuma R, Samavarchi-Tehrani P, Peerani R, Rao BM, Dembowy J, et al. TAZ controls Smad nucleocytoplasmic shuttling and regulates human embryonic stem-cell self-renewal. *Nat Cell Biol*. Nature Publishing Group; 2008;10:837–48.
  68. Varelas X, Miller BW, Sopko R, Song S, Gregorieff A, Fellouse FA, et al. The Hippo

- Pathway Regulates Wnt/ $\beta$ -Catenin Signaling. *Dev Cell*. 2010;18:579–91.
69. Fuchs M, Müller T, Lerch MM, Ullrich A. Association of human protein-tyrosine phosphatase kappa with members of the armadillo family. *J Biol Chem*. 1996;271:16712–9.
  70. Novellino L, De Filippo A, Deho P, Perrone F, Pilotti S, Parmiani G, et al. PTPRK negatively regulates transcriptional activity of wild type and mutated oncogenic  $\beta$ -catenin and affects membrane distribution of  $\beta$ -catenin/E-cadherin complexes in cancer cells. *Cell Signal*. 2008;20:872–83.
  71. Brady-Kalnay SM, Mourton T, Nixon JP, Pietz GE, Kinch M, Chen H, et al. Dynamic interaction of PTPmu with multiple cadherins in vivo. *J Cell Biol*. Rockefeller University Press; 1998;141:287–96.
  72. Brady-Kalnay SM, Rimm DL, Tonks NK. Receptor protein tyrosine phosphatase PTPmu associates with cadherins and catenins in vivo. *J Cell Biol*. The Rockefeller University Press; 1995;130:977–86.
  73. Xu Y, Tan L-J, Grachtchouk V, Voorhees JJ, Fisher GJ. Receptor-type Protein-tyrosine Phosphatase- $\kappa$  Regulates Epidermal Growth Factor Receptor Function. *J Biol Chem*. 2005;280:42694–700.
  74. Sun PH, Ye L, Mason MD, Jiang WG. Receptor-like protein tyrosine phosphatase  $\kappa$  negatively regulates the apoptosis of prostate cancer cells via the JNK pathway. *Int J Oncol*. Spandidos Publications; 2013;43:1560–8.
  75. Bos JL, de Bruyn K, Enserink J, Kuiperij B, Rangarajan S, Rehmann H, et al. The role of Rap1 in integrin-mediated cell adhesion. *Biochem Soc Trans*. 2003;31:83–6.
  76. Katagiri K, Hattori M, Minato N, Irie S k, Takatsu K, Kinashi T. Rap1 is a potent activation signal for leukocyte function-associated antigen 1 distinct from protein kinase C and phosphatidylinositol-3-OH kinase. *Mol Cell Biol*. American Society for Microbiology; 2000;20:1956–69.
  77. Hoshino T, Sakisaka T, Baba T, Yamada T, Kimura T, Takai Y. Regulation of E-cadherin endocytosis by nectin through afadin, Rap1, and p120ctn. *J Biol Chem*. American Society for Biochemistry and Molecular Biology; 2005;280:24095–103.
  78. Massagué J. TGF- $\beta$  signal transduction. *Annu Rev Biochem*. 1998;67:753–91.
  79. Lee MK, Pardoux C, Hall MC, Lee PS, Warburton D, Qing J, et al. TGF- $\beta$  activates Erk MAP kinase signalling through direct phosphorylation of ShcA. *EMBO J*. 2007;26:3957–67.
  80. Zhang YE. Non-Smad pathways in TGF-beta signaling. *Cell Res*. NIH Public Access;



- 2009;19:128–39.
81. Ataie-Kachoe P, Badar S, Morris DL, Pourgholami MH. Minocycline targets the NF- $\kappa$ B Nexus through suppression of TGF- $\beta$ 1-TAK1-I $\kappa$ B signaling in ovarian cancer. *Mol Cancer Res*. American Association for Cancer Research; 2013;11:1279–91.
  82. Ear T, Fortin CF, Simard FA, McDonald PP. Constitutive association of TGF-beta-activated kinase 1 with the IkappaB kinase complex in the nucleus and cytoplasm of human neutrophils and its impact on downstream processes. *J Immunol*. American Association of Immunologists; 2010;184:3897–906.
  83. Wang SE, Xiang B, Zent R, Quaranta V, Pozzi A, Arteaga CL. Transforming Growth Factor Induces Clustering of HER2 and Integrins by Activating Src-Focal Adhesion Kinase and Receptor Association to the Cytoskeleton. *Cancer Res*. 2009;69:475–82.
  84. Ihle JN, Witthuhn BA, Quelle FW, Yamamoto K, Silvennoinen O. Signaling through the hematopoietic cytokine receptors. *Annu Rev Immunol*. Annual Reviews 4139 El Camino Way, P.O. Box 10139, Palo Alto, CA 94303-0139, USA; 1995;13:369–98.
  85. Giordano V, De Falco G, Chiari R, Quinto I, Pelicci PG, Bartholomew L, et al. Shc mediates IL-6 signaling by interacting with gp130 and Jak2 kinase. *J Immunol*. 1997;158:4097–103.
  86. Yin T, Shen R, Feng GS, Yang YC. Molecular characterization of specific interactions between SHP-2 phosphatase and JAK tyrosine kinases. *J Biol Chem*. American Society for Biochemistry and Molecular Biology; 1997;272:1032–7.
  87. Cadigan KM, Waterman ML. TCF/LEFs and Wnt signaling in the nucleus. *Cold Spring Harb Perspect Biol*. Cold Spring Harbor Laboratory Press; 2012;4.
  88. Barberà MJ, Puig I, Domínguez D, Julien-Grille S, Guaita-Esteruelas S, Peiró S, et al. Regulation of Snail transcription during epithelial to mesenchymal transition of tumor cells. *Oncogene*. Nature Publishing Group; 2004;23:7345–54.
  89. van Uden P, Kenneth NS, Rocha S. Regulation of hypoxia-inducible factor-1 $\alpha$  by NF- $\kappa$ B. *Biochem J*. 2008;412:477–84.
  90. Thuault S, Tan E-J, Peinado H, Cano A, Heldin C-H, Moustakas A. HMGA2 and Smads Co-regulate SNAIL1 Expression during Induction of Epithelial-to-Mesenchymal Transition. *J Biol Chem*. 2008;283:33437–46.
  91. Yamashita S, Miyagi C, Fukada T, Kagara H, Che YS, Hirano T. Zinc transporter LIV1 controls epithelial-mesenchymal transition in zebrafish gastrula organizer. *Nature*. Nature Publishing Group; 2004;429:298–302.
  92. Unno J, Satoh K, Hirota M, Kanno A, Hamada S, Ito H, et al. LIV-1 enhances the

- aggressive phenotype through the induction of epithelial to mesenchymal transition in human pancreatic carcinoma cells. *Int J Oncol.* 2009;35:813–21.
93. Xu Q, Briggs J, Park S, Niu G, Kortylewski M, Zhang S, et al. Targeting Stat3 blocks both HIF-1 and VEGF expression induced by multiple oncogenic growth signaling pathways. *Oncogene.* 2005;24:5552–60.
  94. Zhan X, Feng X, Kong Y, Chen Y, Tan W. JNK signaling maintains the mesenchymal properties of multi-drug resistant human epidermoid carcinoma KB cells through snail and twist1. *BioMed Central;* 2013;13:180.
  95. Lee M-H, Koria P, Qu J, Andreadis ST. JNK phosphorylates -catenin and regulates adherens junctions. *FASEB J.* 2009;23:3874–83.
  96. Sahlgren C, Gustafsson M V, Jin S, Poellinger L, Lendahl U. Notch signaling mediates hypoxia-induced tumor cell migration and invasion. *Proc Natl Acad Sci U S A. National Academy of Sciences;* 2008;105:6392–7.
  97. Storci G, Sansone P, Mari S, D’Uva G, Tavolari S, Guarnieri T, et al. TNFalpha up-regulates SLUG via the NF-kappaB/HIF1alpha axis, which imparts breast cancer cells with a stem cell-like phenotype. *J Cell Physiol. NIH Public Access;* 2010 [;225:682–91.
  98. Yang Z, Rayala S, Nguyen D, Vadlamudi RK, Chen S, Kumar R. Pak1 phosphorylation of snail, a master regulator of epithelial-to-mesenchyme transition, modulates snail’s subcellular localization and functions. *Cancer Res.* 2005;65:3179–84.
  99. Niessen K, Fu Y, Chang L, Hoodless PA, McFadden D, Karsan A. Slug is a direct Notch target required for initiation of cardiac cushion cellularization. *J Cell Biol.* 2008;182:315–25.
  100. Leong KG, Niessen K, Kulic I, Raouf A, Eaves C, Pollet I, et al. Jagged1-mediated Notch activation induces epithelial-to-mesenchymal transition through Slug-induced repression of E-cadherin. *J Exp Med.* 2007;204:2935–48.
  101. Kwon O-J, Valdez JM, Zhang L, Zhang B, Wei X, Su Q, et al. Increased Notch signalling inhibits anoikis and stimulates proliferation of prostate luminal epithelial cells. *Nat Commun.* 2014;5:4416.
  102. Nickoloff BJ, Qin J-Z, Chaturvedi V, Denning MF, Bonish B, Miele L. Jagged-1 mediated activation of notch signaling induces complete maturation of human keratinocytes through NF-κB and PPARγ. *Cell Death Differ.* 2002;9:842–55.
  103. Osipo C, Golde TE, Osborne BA, Miele LA. Off the beaten pathway: The complex

- cross talk between Notch and NF- $\kappa$ B. *Lab. Investig.* Nature Publishing Group; 2008. page 11–7.
104. Conacci-Sorrell M, Simcha I, Ben-Yedidia T, Blechman J, Savagner P, Ben-Ze'ev A. Autoregulation of E-cadherin expression by cadherin–cadherin interactions. *J Cell Biol.* 2003;163:847–57.
  105. Liao Y, Lönnnerdal B. Beta-catenin/TCF4 transactivates miR-30e during intestinal cell differentiation. *Cell Mol Life Sci.* 2010;67:2969–78.
  106. Kumarswamy R, Mudduluru G, Ceppi P, Muppala S, Kozlowski M, Niklinski J, et al. MicroRNA-30a inhibits epithelial-to-mesenchymal transition by targeting Snai1 and is downregulated in non-small cell lung cancer. *Int J Cancer.* 2012;130:2044–53.
  107. Peinado H, Ballestar E, Esteller M, Cano A. Snail mediates E-cadherin repression by the recruitment of the Sin3A/histone deacetylase 1 (HDAC1)/HDAC2 complex. *Mol Cell Biol.* American Society for Microbiology; 2004;24:306–19.
  108. Dave N, Guaita-Esteruelas S, Gutarra S, Frias A, Beltran M, Peiro S, et al. Functional cooperation between Snail1 and twist in the regulation of ZEB1 expression during epithelial to mesenchymal transition. *J Biol Chem.* American Society for Biochemistry and Molecular Biology; 2011;286:12024–32.
  109. Beltran M, Puig I, Pena C, Garcia JM, Alvarez AB, Pena R, et al. A natural antisense transcript regulates Zeb2/Sip1 gene expression during Snail1-induced epithelial-mesenchymal transition. *Genes Dev.* 2008;22:756–69.
  110. Moes M, Le Béhec A, Crespo I, Laurini C, Halavatyi A, Vetter G, et al. A novel network integrating a mirna-203/snai1 feedback loop which regulates epithelial to mesenchymal transition. Klymkowsky M, editor. *PLoS One.* Public Library of Science; 2012;7:e35440.
  111. Gill JG, Langer EM, Lindsley RC, Cai M, Murphy TL, Kyba M, et al. Snail and the microRNA-200 Family Act in Opposition to Regulate Epithelial-to-Mesenchymal Transition and Germ Layer Fate Restriction in Differentiating ESCs. *Stem Cells.* 2011;29:764–76.
  112. Bolós V, Peinado H, Pérez-Moreno MA, Fraga MF, Esteller M, Cano A. The transcription factor Slug represses E-cadherin expression and induces epithelial to mesenchymal transitions: a comparison with Snail and E47 repressors. *J Cell Sci.* The Company of Biologists Ltd; 2003;116:499–511.
  113. Wels C, Joshi S, Koefinger P, Bergler H, Schaidler H. Transcriptional Activation of ZEB1 by Slug Leads to Cooperative Regulation of the Epithelial–Mesenchymal

- Transition-Like Phenotype in Melanoma. *J Invest Dermatol.* 2011;131:1877–85.
114. Bracken CP, Gregory PA, Kolesnikoff N, Bert AG, Wang J, Shannon MF, et al. A Double-Negative Feedback Loop between ZEB1-SIP1 and the microRNA-200 Family Regulates Epithelial-Mesenchymal Transition. *Cancer Res.* 2008;68:7846–54.
  115. Eger A, Aigner K, Sonderegger S, Dampier B, Oehler S, Schreiber M, et al. DeltaEF1 is a transcriptional repressor of E-cadherin and regulates epithelial plasticity in breast cancer cells. *Oncogene.* 2005;24:2375–85.
  116. Liu YN, Yin JJ, Abou-Kheir W, Hynes PG, Casey OM, Fang L, et al. MiR-1 and miR-200 inhibit EMT via Slug-dependent and tumorigenesis via Slug-independent mechanisms. *Oncogene.* Nature Publishing Group; 2013;32:296–306.
  117. Perdigão-Henriques R, Petrocca F, Altschuler G, Thomas MP, Le MTN, Tan SM, et al. miR-200 promotes the mesenchymal to epithelial transition by suppressing multiple members of the Zeb2 and Snail1 transcriptional repressor complexes. *Oncogene.* 2016;35:158–72.
  118. Park S-M, Gaur AB, Lengyel E, Peter ME. The miR-200 family determines the epithelial phenotype of cancer cells by targeting the E-cadherin repressors ZEB1 and ZEB2. *Genes Dev.* Cold Spring Harbor Laboratory Press; 2008;22:894–907.
  119. Kim N-G, Koh E, Chen X, Gumbiner BM. E-cadherin mediates contact inhibition of proliferation through Hippo signaling-pathway components. *Proc Natl Acad Sci.* 2011;108:11930–5.
  120. Balzac F, Avolio M, Degani S, Kaverina I, Torti M, Silengo L, et al. E-cadherin endocytosis regulates the activity of Rap1: a traffic light GTPase at the crossroads between cadherin and integrin function. *J Cell Sci.* 2005;118:4765–83.
  121. Hogan C, Serpente N, Cogram P, Hosking CR, Bialucha CU, Feller SM, et al. Rap1 regulates the formation of E-cadherin-based cell-cell contacts. *Mol Cell Biol.* American Society for Microbiology; 2004;24:6690–700.
  122. Shibamoto S, Hayakawa M, Takeuchi K, Hori T, Miyazawa K, Kitamura N, et al. Association of p120, a tyrosine kinase substrate, with E-cadherin/catenin complexes. *J Cell Biol.* 1995;128:949–57.
  123. Chen YT, Stewart DB, Nelson WJ. Coupling assembly of the E-cadherin/beta-catenin complex to efficient endoplasmic reticulum exit and basal-lateral membrane targeting of E-cadherin in polarized MDCK cells. *J Cell Biol.* 1999;144:687–99.

124. Javaid S, Zhang J, Anderssen E, Black JC, Wittner BS, Tajima K, et al. Dynamic Chromatin Modification Sustains Epithelial-Mesenchymal Transition following Inducible Expression of Snail-1. *Cell Rep.* 2013;5:1679–89.
125. Miettinen PJ, Ebner R, Lopez AR, Derynck R. TGF-beta induced transdifferentiation of mammary epithelial cells to mesenchymal cells: involvement of type I receptors. *J Cell Biol.* Rockefeller University Press; 1994;127:2021–36.
126. Vuoriluoto K, Haugen H, Kiviluoto S, Mpindi J-P, Nevo J, Gjerdrum C, et al. Vimentin regulates EMT induction by Slug and oncogenic H-Ras and migration by governing Axl expression in breast cancer. *Oncogene.* 2011;30:1436–48.
127. Zhang J, Lei Y, Gao X, Liang Q, Li L, Feng J, et al. p53 Attenuates the oncogenic Ras-induced epithelial–mesenchymal transition in human mammary epithelial cells. *Biochem Biophys Res Commun.* Academic Press; 2013;434:606–13.
128. Franco DL, Mainez J, Vega S, Sancho P, Murillo MM, de Frutos CA, et al. Snail1 suppresses TGF- $\beta$ -induced apoptosis and is sufficient to trigger EMT in hepatocytes. *J Cell Sci.* 2010;123:3467–77.
129. Gregory PA, Bert AG, Paterson EL, Barry SC, Tsykin A, Farshid G, et al. The miR-200 family and miR-205 regulate epithelial to mesenchymal transition by targeting ZEB1 and SIP1. *Nat Cell Biol.* 2008;10:593–601.
130. Behrens J, Vakaet L, Friis R, Winterhager E, Van Roy F, Mareel MM, et al. Loss of epithelial differentiation and gain of invasiveness correlates with tyrosine phosphorylation of the E-cadherin/beta-catenin complex in cells transformed with a temperature-sensitive v-SRC gene. *J Cell Biol.* 1993;120:757–66.
131. Lu Z, Jiang G, Blume-Jensen P, Hunter T. Epidermal Growth Factor-Induced Tumor Cell Invasion and Metastasis Initiated by Dephosphorylation and Downregulation of Focal Adhesion Kinase. *Mol Cell Biol.* 2001;21:4016–31.
132. Abou-Jaoudé W, Traynard P, Monteiro PT, Saez-Rodriguez J, Helikar T, Thieffry D, et al. Logical Modeling and Dynamical Analysis of Cellular Networks. *Front Genet.* 2016;7:94.
133. Monteiro PT, Abou-Jaoudé W, Thieffry D, Chaouiya C. Model Checking Logical Regulatory Networks. *IFAC Proc Vol.* 2014;47:170–5.
134. Abou-Jaoudé W, Monteiro PT, Naldi A, Grandclaudon M, Soumelis V, Chaouiya C, et al. Model Checking to Assess T-Helper Cell Plasticity. *Front Bioeng Biotechnol.* 2015;2:86.

135. Lomuscio A, Pecheur C, Raimondi F. Automatic Verification of Knowledge and Time with NuSMV. IJCAI/ AAAI Press. 2007. page 1384–9.
